# Supplementary material
Source: Springer Nature journal article supplement (https://www.springermedizin.de/resource/supplementary/12889_2007_1086_MOESM1_ESM.pdf/9502420)
Supplement: MOESM1 [file 9502420]

# Additional file 1 — Leading causes of premature death by ethnicity and sex, San Francisco, 2003-2004

Tomás J. Aragón, MD, DrPH

December 28, 2007

**Table A-1: Leading causes of premature death for African Americans, San Francisco, 2003–2004**

| Rank   | Underlying cause of death             | <i>YLL</i> | <i>YLL</i><br>% <sup>a</sup> | Deaths | Average<br><i>YLL</i> <sup>b</sup> | <i>ASYR</i> <sup>c,d</sup> |
|--------|---------------------------------------|------------|------------------------------|--------|------------------------------------|----------------------------|
| Male   |                                       |            |                              |        |                                    |                            |
| 1      | Violence/assault, all mechanisms      | 1607.8     | 11.9                         | 62     | 25.9                               | 3110.9                     |
| 2      | Drug overdose, unintentional          | 711.5      | 5.3                          | 36     | 19.8                               | 1118.8                     |
| 3      | HIV/AIDS                              | 1183.7     | 8.7                          | 60     | 19.7                               | 1790.7                     |
| 4      | Alcohol use disorders                 | 468.4      | 3.5                          | 30     | 15.6                               | 729.7                      |
| 5      | Hypertensive heart disease            | 882.2      | 6.5                          | 60     | 14.7                               | 1391.5                     |
| 6      | Lung, bronchus, and trachea cancers   | 679.7      | 5.0                          | 52     | 13.1                               | 1088.8                     |
| 7      | Diabetes mellitus                     | 429.5      | 3.2                          | 34     | 12.6                               | 730.9                      |
| 8      | Ischemic heart disease                | 1420.5     | 10.5                         | 120    | 11.8                               | 2376.2                     |
| 9      | Chronic obstructive pulmonary disease | 460.1      | 3.4                          | 39     | 11.8                               | 755.9                      |
| 10     | Cerebrovascular disease               | 557.2      | 4.1                          | 52     | 10.7                               | 938.7                      |
| Female |                                       |            |                              |        |                                    |                            |
| 1      | Drug overdose, unintentional          | 203.4      | 2.4                          | 9      | 22.6                               | 360.5                      |
| 2      | HIV/AIDS                              | 379.9      | 4.4                          | 17     | 22.3                               | 685.6                      |
| 3      | Breast Cancer                         | 554.8      | 6.5                          | 39     | 14.2                               | 880.0                      |
| 4      | Nephritis and nephrosis               | 217.0      | 2.5                          | 18     | 12.1                               | 338.1                      |
| 5      | Lung, bronchus, and trachea cancers   | 422.0      | 4.9                          | 36     | 11.7                               | 599.9                      |
| 6      | Chronic obstructive pulmonary disease | 244.7      | 2.9                          | 21     | 11.7                               | 369.9                      |
| 7      | Hypertensive heart disease            | 525.9      | 6.2                          | 49     | 10.7                               | 761.5                      |
| 8      | Diabetes mellitus                     | 296.3      | 3.5                          | 32     | 9.3                                | 407.0                      |
| 9      | Ischemic heart disease                | 1161.4     | 13.6                         | 137    | 8.5                                | 1554.4                     |
| 10     | Cerebrovascular disease               | 674.4      | 7.9                          | 82     | 8.2                                | 893.2                      |

<sup>a</sup>  $YLL\% = YLL \div \text{Total } YLL \text{ from all causes}$  (Step 1: used to select top 10 causes)

<sup>b</sup>  $\text{Average } YLL = YLL \div \text{Deaths}$  (Step 2: used to subrank top 10 causes)

<sup>c</sup>  $ASYR = \text{Age-standardized } YLL \text{ rate per } 100,000 \text{ persons per year}$

<sup>d</sup> Rates calculated from less than 20 deaths may be unreliable.

**Table A-2: Leading causes of premature death for Asians/Pacific Islanders, San Francisco, 2003–2004**

| Rank   | Underlying cause of death               | <i>YLL</i> | <i>YLL</i><br>% <sup>a</sup> | Deaths | Average<br><i>YLL</i> <sup>b</sup> | <i>ASYR</i> <sup>c,d</sup> |
|--------|-----------------------------------------|------------|------------------------------|--------|------------------------------------|----------------------------|
| Male   |                                         |            |                              |        |                                    |                            |
| 1      | Self-inflicted injuries, all mechanisms | 613.8      | 4.1                          | 31     | 19.8                               | 240.0                      |
| 2      | Liver cancer                            | 883.2      | 5.9                          | 71     | 12.4                               | 320.0                      |
| 3      | Lymphomas and multiple myeloma          | 334.9      | 2.3                          | 33     | 10.1                               | 121.6                      |
| 4      | Hypertensive heart disease              | 564.7      | 3.8                          | 58     | 9.7                                | 205.3                      |
| 5      | Colon and rectum cancers                | 395.5      | 2.7                          | 41     | 9.6                                | 143.8                      |
| 6      | Lung, bronchus, and trachea cancers     | 1345.6     | 9.1                          | 144    | 9.3                                | 475.3                      |
| 7      | Cerebrovascular disease                 | 1409.7     | 9.5                          | 168    | 8.4                                | 519.1                      |
| 8      | Ischemic heart disease                  | 2204.6     | 14.8                         | 289    | 7.6                                | 820.9                      |
| 9      | Chronic obstructive pulmonary disease   | 598.3      | 4.0                          | 88     | 6.8                                | 213.5                      |
| 10     | Lower respiratory infections            | 434.9      | 2.9                          | 73     | 6.0                                | 160.3                      |
| Female |                                         |            |                              |        |                                    |                            |
| 1      | Breast Cancer                           | 752.6      | 5.6                          | 49     | 15.4                               | 235.9                      |
| 2      | Liver cancer                            | 372.7      | 2.8                          | 34     | 11.0                               | 103.5                      |
| 3      | Lymphomas and multiple myeloma          | 346.7      | 2.6                          | 33     | 10.5                               | 95.0                       |
| 4      | Lung, bronchus, and trachea cancers     | 957.8      | 7.2                          | 93     | 10.3                               | 263.4                      |
| 5      | Colon and rectum cancers                | 491.8      | 3.7                          | 48     | 10.2                               | 138.1                      |
| 6      | Hypertensive heart disease              | 514.1      | 3.8                          | 67     | 7.7                                | 131.4                      |
| 7      | Diabetes mellitus                       | 363.0      | 2.7                          | 49     | 7.4                                | 94.5                       |
| 8      | Cerebrovascular disease                 | 1623.6     | 12.2                         | 221    | 7.3                                | 428.1                      |
| 9      | Ischemic heart disease                  | 1860.7     | 13.9                         | 265    | 7.0                                | 489.0                      |
| 10     | Lower respiratory infections            | 378.1      | 2.8                          | 69     | 5.5                                | 96.9                       |

<sup>a</sup>  $YLL\% = YLL \div \text{Total } YLL \text{ from all causes}$  (Step 1: used to select top 10 causes)

<sup>b</sup> Average  $YLL = YLL \div \text{Deaths}$  (Step 2: used to subrank top 10 causes)

<sup>c</sup>  $ASYR = \text{Age-standardized } YLL \text{ rate per } 100,000 \text{ persons per year}$

<sup>d</sup> Rates calculated from less than 20 deaths may be unreliable.

**Table A-3: Leading causes of premature death for Latinos/Hispanics, San Francisco, 2003–2004**

| Rank   | Underlying cause of death               | <i>YLL</i> | <i>YLL</i><br>% <sup>a</sup> | Deaths | Average<br><i>YLL</i> <sup>b</sup> | <i>ASYR</i> <sup>c,d</sup> |
|--------|-----------------------------------------|------------|------------------------------|--------|------------------------------------|----------------------------|
| Male   |                                         |            |                              |        |                                    |                            |
| 1      | Violence/assault, all mechanisms        | 582.8      | 7.7                          | 22     | 26.5                               | 482.7                      |
| 2      | Self-inflicted injuries, all mechanisms | 213.1      | 2.8                          | 9      | 23.7                               | 135.2                      |
| 3      | HIV/AIDS                                | 888.4      | 11.7                         | 41     | 21.7                               | 667.7                      |
| 4      | Alcohol use disorders                   | 384.7      | 5.1                          | 19     | 20.2                               | 314.5                      |
| 5      | Cirrhosis of the liver                  | 354.5      | 4.7                          | 20     | 17.7                               | 356.2                      |
| 6      | Liver cancer                            | 203.7      | 2.7                          | 14     | 14.5                               | 235.5                      |
| 7      | Diabetes mellitus                       | 257.3      | 3.4                          | 19     | 13.5                               | 283.3                      |
| 8      | Hypertensive heart disease              | 283.9      | 3.8                          | 22     | 12.9                               | 359.8                      |
| 9      | Ischemic heart disease                  | 813.4      | 10.8                         | 78     | 10.4                               | 1031.4                     |
| 10     | Cerebrovascular disease                 | 249.8      | 3.3                          | 25     | 10.0                               | 325.6                      |
| Female |                                         |            |                              |        |                                    |                            |
| 1      | Self-inflicted injuries, all mechanisms | 124.6      | 2.8                          | 5      | 24.9                               | 119.8                      |
| 2      | HIV/AIDS                                | 138.5      | 3.1                          | 6      | 23.1                               | 132.4                      |
| 3      | Breast Cancer                           | 202.2      | 4.5                          | 14     | 14.4                               | 195.8                      |
| 4      | Cirrhosis of the liver                  | 226.0      | 5.0                          | 18     | 12.6                               | 230.7                      |
| 5      | Lung, bronchus, and trachea cancers     | 197.0      | 4.4                          | 19     | 10.4                               | 193.1                      |
| 6      | Diabetes mellitus                       | 161.6      | 3.6                          | 17     | 9.5                                | 159.4                      |
| 7      | Hypertensive heart disease              | 144.7      | 3.2                          | 19     | 7.6                                | 142.3                      |
| 8      | Ischemic heart disease                  | 418.9      | 9.3                          | 60     | 7.0                                | 401.0                      |
| 9      | Cerebrovascular disease                 | 322.2      | 7.1                          | 46     | 7.0                                | 307.8                      |
| 10     | Lower respiratory infections            | 113.1      | 2.5                          | 19     | 6.0                                | 109.4                      |

<sup>a</sup>  $YLL\% = YLL \div \text{Total } YLL \text{ from all causes}$  (Step 1: used to select top 10 causes)

<sup>b</sup>  $\text{Average } YLL = YLL \div \text{Deaths}$  (Step 2: used to subrank top 10 causes)

<sup>c</sup>  $ASYR = \text{Age-standardized } YLL \text{ rate per } 100,000 \text{ persons per year}$

<sup>d</sup> Rates calculated from less than 20 deaths may be unreliable.

**Table A-4: Leading causes of premature death for Whites, San Francisco, 2003–2004**

| Rank   | Underlying cause of death               | <i>YLL</i> |                | Deaths | Average                 |                           |
|--------|-----------------------------------------|------------|----------------|--------|-------------------------|---------------------------|
|        |                                         | <i>YLL</i> | % <sup>a</sup> |        | <i>YLL</i> <sup>b</sup> | <i>ASR</i> <sup>c,d</sup> |
| Male   |                                         |            |                |        |                         |                           |
| 1      | Drug overdose, unintentional            | 1670.9     | 4.6            | 74     | 22.6                    | 393.4                     |
| 2      | HIV/AIDS                                | 3975.1     | 10.9           | 198    | 20.1                    | 810.9                     |
| 3      | Self-inflicted injuries, all mechanisms | 2006.4     | 5.5            | 102    | 19.7                    | 500.8                     |
| 4      | Alcohol use disorders                   | 1196.2     | 3.3            | 69     | 17.3                    | 274.2                     |
| 5      | Hypertensive heart disease              | 1582.9     | 4.3            | 143    | 11.1                    | 434.0                     |
| 6      | Lung, bronchus, and trachea cancers     | 1913.9     | 5.3            | 175    | 10.9                    | 506.5                     |
| 7      | Ischemic heart disease                  | 5339.0     | 14.7           | 607    | 8.8                     | 1463.4                    |
| 8      | Chronic obstructive pulmonary disease   | 1041.2     | 2.9            | 126    | 8.3                     | 299.0                     |
| 9      | Lower respiratory infections            | 1039.2     | 2.9            | 137    | 7.6                     | 282.5                     |
| 10     | Cerebrovascular disease                 | 1156.3     | 3.2            | 168    | 6.9                     | 329.2                     |
| Female |                                         |            |                |        |                         |                           |
| 1      | Self-inflicted injuries, all mechanisms | 676.9      | 2.8            | 32     | 21.2                    | 194.3                     |
| 2      | Breast Cancer                           | 1416.1     | 5.9            | 118    | 12.0                    | 383.8                     |
| 3      | Lung, bronchus, and trachea cancers     | 1780.1     | 7.4            | 177    | 10.1                    | 472.2                     |
| 4      | Colon and rectum cancers                | 647.6      | 2.7            | 80     | 8.1                     | 158.5                     |
| 5      | Hypertensive heart disease              | 994.0      | 4.1            | 131    | 7.6                     | 236.4                     |
| 6      | Chronic obstructive pulmonary disease   | 1139.6     | 4.7            | 152    | 7.5                     | 270.8                     |
| 7      | Cerebrovascular disease                 | 1556.2     | 6.5            | 262    | 5.9                     | 324.0                     |
| 8      | Ischemic heart disease                  | 3179.5     | 13.2           | 547    | 5.8                     | 674.9                     |
| 9      | Lower respiratory infections            | 887.7      | 3.7            | 159    | 5.6                     | 185.4                     |
| 10     | Alzheimer and other dementias           | 914.7      | 3.8            | 193    | 4.7                     | 167.7                     |

<sup>a</sup>  $YLL\% = YLL \div \text{Total } YLL \text{ from all causes}$  (Step 1: used to select top 10 causes)

<sup>b</sup>  $\text{Average } YLL = YLL \div \text{Deaths}$  (Step 2: used to subrank top 10 causes)

<sup>c</sup>  $ASR = \text{Age-standardized } YLL \text{ rate per } 100,000 \text{ persons per year}$

<sup>d</sup> Rates calculated from less than 20 deaths may be unreliable.
